# Supplementary material for: A Conserved Role for Human Nup98 in Altering Chromatin Structure and Promoting Epigenetic Transcriptional Memory
Source: PLoS Biol. 2013 Mar 26;11(3):e1001524. doi: 10.1371/journal.pbio.1001524 (PMC3608542; doi:10.1371/journal.pbio.1001524)
Supplement: Table S1 — IFN-γ-induced genes organized into clusters. For Tables S2–S5, 24,251 genes were used as the background set. Of these, 16,766 were associated with Gene Ontology terms (GO terms; 08/04/12 GO database). (XLSX) [file pbio.1001524.s010.xlsx]

## Sheet: Table S1
Cluster 1
gene_name	NAME	GWEIGHT	AVG6hACT	AVG24hACT	AVG6hREACT	AVG24hREACT
AMY1A	AMY1A	1	0.01917	1.9799	3.21012	4.71132
ANGEL2	ANGEL2	1	0.44966	1.51536	4.68219	3.49868
ANKRA2	ANKRA2	1	-0.01434	2.85801	3.29169	4.12151
ANKRD42	ANKRD42	1	0.24195	2.0971	2.71208	2.80168
ANXA10	ANXA10	1	-0.108008	2.41379	2.28093	4.68834
APBB2	APBB2	1	1.7498	0.876985	5.38766	2.75743
APOL3	APOL3	1	4.12946	2.93445	3.97325	2.16627
APOL6	APOL6	1	2.90633	2.00607	3.30815	1.52643
ARL6	ARL6	1	0.346337	1.75797	2.44528	4.45259
B3GNT2	B3GNT2	1	0.851983	2.07591	4.6001	6.46649
BANK1	BANK1	1	1.62275	3.5132	3.84621	5.17035
BCL6	BCL6	1	1.04353	2.09049	1.80056	4.35231
BICD1	BICD1	1	0.809538	1.89123	1.74131	3.80886
BIRC3	BIRC3	1	1.26103	1.95524	3.63952	5.41052
C10orf37	C10orf37	1	0.531185	1.50317	2.16452	4.16598
C12orf22	C12orf22	1	0.774155	1.50405	2.97219	2.86617
C16orf69	C16orf69	1	0.802405	2.39317	2.88847	4.42488
C1orf211	C1orf211	1	0.429915	2.30735	1.83909	3.61852
C1orf24	C1orf24	1	-0.491708	2.49552	1.20975	5.47636
C1S	C1S	1	1.73602	1.76171	3.51864	2.99403
C2	C2	1	1.79419	2.35756	2.70739	2.27796
C20orf6	C20orf6	1	0.469975	1.49215	3.95601	5.29862
C2orf31	C2orf31	1	1.0463	1.33512	2.43707	3.02592
C4B	C4B	1	1.87244	0.82381	4.32881	2.61621
C6orf141	C6orf141	1	1.36327	2.11217	3.08065	4.41591
C6orf65	C6orf65	1	0.61629	1.83163	3.49608	4.26567
C8orf59	C8orf59	1	0.563458	1.59753	4.1556	5.63278
CALB2	CALB2	1	-0.995273	4.80154	3.44424	2.54195
CASD1	CASD1	1	0.346815	1.91609	4.24467	5.30208
CCDC68	CCDC68	1	2.37399	0.766317	3.85633	1.98646
CENTD1	CENTD1	1	1.16239	2.1709	4.18407	5.30486
CETN3	CETN3	1	0.389833	2.35367	2.7295	3.89624
CHIC2	CHIC2	1	0.72754	1.28224	2.35459	3.49274
CIITA	CIITA	1	3.56023	3.27321	3.24898	2.27102
CLDN23	CLDN23	1	1.96408	4.16756	3.15545	5.18488
COL4A1	COL4A1	1	0.97458	1.52181	5.8681	6.46465
CR1L	CR1L	1	1.83701	4.00523	1.20355	4.17246
CREM	CREM	1	1.36645	1.37567	2.88477	3.09337
CRNKL1	CRNKL1	1	0.27984	2.05835	3.40119	5.23087
CXCL9	CXCL9	1	0.81151	1.9739	3.36688	4.19179
CYP4V2	CYP4V2	1	1.10646	2.41679	2.13997	4.41148
DCBLD2	DCBLD2	1	0.553285	1.54571	3.69172	4.78183
DCTN6	DCTN6	1	0.63523	1.8976	4.70579	5.37804
DDX58	DDX58	1	2.02136	3.19193	4.20167	5.29342
DIRAS3	DIRAS3	1	0.575137	1.48125	1.93134	3.74367
DKK3	DKK3	1	0.740225	2.93023	3.61913	5.57064
DNAJB9	DNAJB9	1	1.16143	1.6509	3.95599	3.47736
DSCR1	DSCR1	1	1.59179	0.80305	5.37141	4.08505
DTX3L	DTX3L	1	2.85867	1.80028	5.43855	2.61506
E2F7	E2F7	1	0.829965	1.8757	2.36363	3.48096
EIF1B	EIF1B	1	0.611745	1.74642	3.1375	4.03464
EIF5A2	EIF5A2	1	1.3562	2.24776	4.05155	3.66039
ENC1	ENC1	1	2.01353	1.4993	3.10444	2.45957
FAM83B	FAM83B	1	0.727415	2.68459	3.27746	2.88287
FAS	FAS	1	1.31919	1.5914	5.04207	6.09955
FBXL20	FBXL20	1	-0.067165	3.21835	1.74653	5.263
FCGR2A	FCGR2A	1	0.480209	2.29944	2.59044	4.01295
FKBP1B	FKBP1B	1	-0.057345	2.02556	2.66435	6.08739
FLJ31033	FLJ31033	1	1.91384	1.34108	3.7802	2.47414
FLJ45832	FLJ45832	1	0.192185	2.10633	2.28342	5.37661
FOXO1A	FOXO1A	1	0.205338	2.7104	1.49963	4.20322
FST	FST	1	3.38878	5.00573	3.04133	3.40135
FUT11	FUT11	1	0.734058	1.74649	3.48918	1.70712
GALNACT-2	GALNACT-2	1	0.75873	1.50286	5.30685	6.48168
GBP2	GBP2	1	1.99739	1.85004	5.1318	4.35098
GBP5	GBP5	1	2.48265	1.91831	4.98004	2.5495
GBP6	GBP6	1	1.04596	1.72277	4.21028	1.54398
GCLC	GCLC	1	0.627763	1.95292	3.10862	4.3813
GDAP2	GDAP2	1	0.235157	1.76304	1.63291	3.84175
GEM	GEM	1	1.49156	1.67626	2.37123	4.0275
GLRB	GLRB	1	-0.125055	2.32552	2.18599	6.08028
GPC5	GPC5	1	0.790025	1.52121	3.3526	5.0593
GPR137C	GPR137C	1	0.525525	2.62935	1.23582	4.63645
GRAMD1B	GRAMD1B	1	1.64217	2.32583	1.68366	3.55828
GRAMD3	GRAMD3	1	2.41046	1.80331	3.28246	2.40625
HAS2	HAS2	1	2.33266	1.18352	5.41645	3.31527
HELB	HELB	1	0.959125	1.6758	3.01451	4.86684
HLA-DMA	HLA-DMA	1	1.48248	2.44808	3.22593	2.3413
HLA-DQA1	HLA-DQA1	1	0.909263	2.97519	5.92684	4.76236
HLA-DQB1	HLA-DQB1	1	1.1398	3.48677	4.95433	3.86967
IFI16	IFI16	1	1.87314	2.36033	5.22088	4.95222
IFI44L	IFI44L	1	1.00506	1.33739	6.98052	4.73821
IFIT5	IFIT5	1	1.74618	2.03793	4.16781	4.33908
IL15	IL15	1	1.54748	1.03081	5.60576	3.27307
IL6	IL6	1	3.11497	3.40098	3.35703	2.63939
IL8	IL8	1	2.76281	3.96325	2.39342	3.24039
IPLA2(GAMMA)	IPLA2(GAMMA)	1	0.025795	2.63489	1.90193	5.34516
IRF1	IRF1	1	3.71041	1.33712	4.16374	1.80931
IRS2	IRS2	1	0.86084	1.93591	4.29064	6.33142
ITK	ITK	1	3.73518	1.4533	3.89398	0.817035
ITPR2	ITPR2	1	0.932365	1.10878	3.60435	5.15967
JAK2	JAK2	1	2.68874	2.48182	5.20925	3.45081
JMJD2D	JMJD2D	1	-0.230255	3.12634	1.57197	5.96648
KBTBD2	KBTBD2	1	0.65069	1.33616	2.67469	3.47993
KCNJ2	KCNJ2	1	0.131415	3.09244	1.52	6.48842
KCR1	KCR1	1	0.40837	2.53268	2.64493	5.9749
KIAA1666	KIAA1666	1	1.7807	4.73698	2.92643	5.90795
KLF4	KLF4	1	1.76979	0.487582	3.70136	3.3175
LACTB	LACTB	1	1.26857	1.05802	4.12533	4.40267
LAMP3	LAMP3	1	2.69306	2.97809	3.53185	2.74764
LMTK2	LMTK2	1	-0.278195	2.42178	2.33244	5.25855
LOC147645	LOC147645	1	0.40648	2.3248	3.24775	1.7246
LOC285047	LOC285047	1	0.722625	2.18922	0.87645	4.54217
LOC317671	LOC317671	1	0.379288	2.52276	1.14996	4.26673
LOC387895	LOC387895	1	2.11191	3.46697	3.59987	1.70657
LOC440067	LOC440067	1	1.90186	2.28595	2.50895	2.48647
LOC644147	LOC644147	1	0.772	2.14452	2.92082	4.70639
LOC645143	LOC645143	1	0.33839	2.0276	2.16769	3.6245
LOC646309	LOC646309	1	1.0046	1.19033	6.7042	6.53022
LOC647017	LOC647017	1	-0.03557	2.04117	1.89385	4.06237
LOC653108	LOC653108	1	-0.162745	3.03407	0.634305	4.7732
LOC653815	LOC653815	1	-0.043325	2.54362	3.85797	7.20395
LRAP	LRAP	1	2.43572	1.90735	4.36901	2.38803
LRIG1	LRIG1	1	1.28615	2.87094	3.25911	4.69578
LRRIQ2	LRRIQ2	1	0.234455	2.20451	2.95055	3.66389
MALT1	MALT1	1	0.977592	1.26082	3.97916	2.91907
MAOB	MAOB	1	0.989435	1.91108	2.61465	4.84508
MAP2K1IP1	MAP2K1IP1	1	0.40163	1.63949	2.90415	4.99482
MAPK6	MAPK6	1	0.558345	1.69191	3.92464	5.72064
MGC12965	MGC12965	1	-0.06297	2.1076	2.18693	4.21429
MGC26963	MGC26963	1	0.825	2.36107	3.51656	5.6946
MGC5509	MGC5509	1	1.14043	1.83799	3.5351	2.38212
MLR2	MLR2	1	0.397363	1.55304	3.83892	4.99057
MX2	MX2	1	2.78064	2.29189	4.85821	3.1174
NDUFB3	NDUFB3	1	3.1002	3.61357	3.14588	3.48729
NECAP1	NECAP1	1	0.495045	1.63046	2.85161	4.29477
NKIRAS1	NKIRAS1	1	0.635883	1.55124	4.10317	5.68218
NT5E	NT5E	1	2.04434	3.43965	4.38642	2.61456
NTN4	NTN4	1	1.59654	1.82255	3.04566	2.02553
OAS1	OAS1	1	3.0849	3.23004	4.29124	2.82886
OBFC2A	OBFC2A	1	0.95117	1.05755	4.14201	4.11146
OLR1	OLR1	1	3.13848	1.47696	5.56379	2.36586
OPTN	OPTN	1	0.82091	2.36518	1.89073	3.70004
OSBPL6	OSBPL6	1	0.760363	1.3216	1.59488	3.59995
OSTM1	OSTM1	1	0.423833	1.79245	1.84171	3.98951
PAQR5	PAQR5	1	-0.34213	2.52164	4.13969	3.26682
PARP14	PARP14	1	2.72816	2.41357	4.41196	3.48469
PARP8	PARP8	1	1.44905	0.707717	5.56248	4.58837
PCGF5	PCGF5	1	0.971122	2.11154	4.09995	5.81011
PDCD1LG2	PDCD1LG2	1	3.02254	2.54065	3.53825	2.51984
PHF11	PHF11	1	1.23251	1.21907	3.37266	2.62333
PHLDA1	PHLDA1	1	3.03713	3.13703	3.7018	4.83185
PHLPPL	PHLPPL	1	0.658775	2.91574	2.53629	5.5113
PKIB	PKIB	1	0.728635	2.32761	3.96849	6.73753
PLSCR1	PLSCR1	1	1.86279	0.979235	5.66138	2.86547
PLSCR2	PLSCR2	1	1.93521	2.13741	5.15114	4.73259
PMAIP1	PMAIP1	1	1.2713	0.952108	2.81754	3.70235
POPDC3	POPDC3	1	0.879293	1.82671	2.62385	2.49002
PPAP2B	PPAP2B	1	1.57247	1.48118	2.39903	2.74492
PPIL3	PPIL3	1	0.522122	1.72711	2.0232	3.51353
PPP3R1	PPP3R1	1	0.822002	1.95626	3.4892	3.49812
PRDM1	PRDM1	1	0.528798	1.9541	1.96758	3.54778
PRRG1	PRRG1	1	1.05967	2.15767	3.80215	6.02446
PRRG4	PRRG4	1	2.51495	-0.02761	6.56356	5.29149
PTGS2	PTGS2	1	1.50726	0.505426	5.22464	4.08005
PTHLH	PTHLH	1	0.593367	1.69082	3.75761	2.33646
PTPRE	PTPRE	1	1.36242	2.55086	2.44843	2.63351
RAB18	RAB18	1	0.811873	2.11586	1.96201	4.35257
RAB23	RAB23	1	0.731	1.26624	5.40978	5.48624
RAB27B	RAB27B	1	1.42921	3.05968	4.4707	6.2797
RAB2B	RAB2B	1	1.0256	1.55336	5.18363	4.2156
RAD52	RAD52	1	0.216225	1.71094	4.55291	6.03316
RARRES3	RARRES3	1	3.93554	3.84483	3.39599	2.21937
RDHE2	RDHE2	1	0.795104	3.032	1.48296	4.0686
RG9MTD2	RG9MTD2	1	0.502675	1.71984	1.90718	4.40189
RGS20	RGS20	1	1.6193	2.17891	3.31089	2.81438
RNF14	RNF14	1	0.56236	2.27494	3.80136	4.62899
RNF148	RNF148	1	1.21003	2.04808	2.42939	4.78414
RP11-564C4.1	RP11-564C4.1	1	0.96481	1.65574	4.58104	5.10222
RP11-98I6.3	RP11-98I6.3	1	1.00195	1.89287	3.13403	4.50491
RPP40	RPP40	1	0.349118	1.99537	3.04107	5.41515
SAMD9	SAMD9	1	1.07532	1.75412	5.07594	5.31557
SCN2A2	SCN2A2	1	-0.08279	2.60032	3.30168	4.39268
SCN9A	SCN9A	1	1.95051	2.66456	3.6758	3.15508
SERPING1	SERPING1	1	3.04316	3.15525	3.82699	2.77269
SETBP1	SETBP1	1	0.58792	1.57748	2.65966	5.11796
SH3GL2	SH3GL2	1	0.912975	2.0604	1.54157	4.35989
SLC15A3	SLC15A3	1	3.50519	2.79445	5.01856	2.73102
SLC26A9	SLC26A9	1	2.00401	3.75228	1.94009	3.86686
SLC31A2	SLC31A2	1	0.64091	1.75188	2.42312	4.14888
SLC35F1	SLC35F1	1	0.92671	2.69972	2.46909	3.3067
SLC9A2	SLC9A2	1	0.256785	1.84201	2.57736	3.74326
SLFN5	SLFN5	1	1.25494	1.35117	3.25821	3.07205
SLITRK4	SLITRK4	1	0.701185	1.39438	3.34114	1.86285
SOCS1	SOCS1	1	3.89084	2.89227	3.32637	2.05927
SP100	SP100	1	1.33223	1.3909	3.78857	3.32925
SPDYA	SPDYA	1	0.365048	2.55696	1.68702	4.3391
SPRY2	SPRY2	1	2.23655	1.73676	3.18806	3.1393
SPRY4	SPRY4	1	3.89555	2.3702	2.13887	3.94483
STAT1	STAT1	1	1.81488	1.29956	5.39646	4.60384
STEAP1	STEAP1	1	0.874537	2.04975	2.15833	3.63874
STK17A	STK17A	1	0.839657	1.34908	4.30734	4.68371
STK17B	STK17B	1	0.885155	1.70114	2.82594	2.45675
STYK1	STYK1	1	1.44302	1.35316	2.70887	2.77429
TARSL2	TARSL2	1	0.540342	1.68847	2.64968	2.76603
TFPI2	TFPI2	1	1.65165	1.92266	5.41017	2.60515
TICAM2	TICAM2	1	1.03254	1.47026	3.34727	1.72582
TLR3	TLR3	1	2.98828	0.93868	6.71984	3.63634
TLR4	TLR4	1	2.41261	2.31702	4.0259	3.37295
TMEM47	TMEM47	1	0.35026	1.76494	2.02395	4.55267
TPBG	TPBG	1	1.02456	1.23514	6.60115	3.84097
TRIB2	TRIB2	1	3.63237	2.56196	4.03767	2.10237
TRIM2	TRIM2	1	1.18858	1.30729	3.43623	2.74774
TRIM6-TRIM34	TRIM6-TRIM34	1	0.579465	1.84923	2.36405	2.9827
UBR1	UBR1	1	0.71224	1.48726	4.07257	5.04616
ZBTB41	ZBTB41	1	0.730333	1.64793	3.70282	5.45516
ZCSL2	ZCSL2	1	0.42647	1.57774	3.63416	5.85685
ZNF17	ZNF17	1	0.670815	2.28201	2.03701	4.35265
ZNF187	ZNF187	1	0.319035	1.67202	1.98269	4.5666
ZNF238	ZNF238	1	0.895095	2.67862	2.54288	3.9969
ZNF283	ZNF283	1	0.5338	1.92078	3.03744	4.38959
ZNF443	ZNF443	1	0.575585	2.64174	4.09869	7.28506
ZNF485	ZNF485	1	0.648835	1.52212	3.21745	4.13589
ZNF6	ZNF6	1	-0.103865	2.31068	1.16152	5.03252
ZNF619	ZNF619	1	0.318885	2.62337	0.934205	4.43023
ZNF643	ZNF643	1	0.891112	2.39671	2.54845	4.6684
ZNF670	ZNF670	1	0.189765	2.22692	2.46663	6.22287
ZNF92	ZNF92	1	0.588897	1.40011	3.903	3.82931
Cluster 2
gene_name	NAME	GWEIGHT	AVG6hACT	AVG24hACT	AVG6hREACT	AVG24hREACT
ABCG1	ABCG1	1	-0.091795	2.7975	0.041355	3.86377
ACE2	ACE2	1	0.269645	1.75642	0.429588	1.3876
ACOX2	ACOX2	1	0.19045	3.98052	1.31312	1.80776
ACVR1C	ACVR1C	1	0.30077	1.72993	0.497085	1.70649
ACY3	ACY3	1	1.4404	1.11411	0.79486	0.36518
ADM	ADM	1	0.22565	2.03422	-0.722495	1.4026
AGBL2	AGBL2	1	1.13233	0.978927	1.58282	2.31866
AGTR1	AGTR1	1	0.998435	1.06442	0.6693	1.29913
ALPK1	ALPK1	1	1.59989	1.44917	2.09931	0.680788
ALPK2	ALPK2	1	1.59161	1.62551	0.960137	0.73655
AMY1B	AMY1B	1	0.000905	2.07615	2.34516	1.97554
ANAPC10	ANAPC10	1	0.630567	1.91142	0.258997	1.47892
ANKRD30A	ANKRD30A	1	0.775495	1.18645	0.940375	0.84309
ANKRD37	ANKRD37	1	0.649425	1.70391	-0.474495	1.40524
ANTXR2	ANTXR2	1	1.65918	1.85732	2.21232	1.5095
APOBEC3F	APOBEC3F	1	0.2099	2.53566	-0.554032	1.33484
APOL1	APOL1	1	4.43192	4.01283	2.19735	-0.069132
APOL4	APOL4	1	2.47809	2.43194	1.69213	0.699542
AREG	AREG	1	2.70419	2.05716	0.01724	1.1218
ARHGAP26	ARHGAP26	1	0.824605	1.77557	0.59117	1.0936
ARMCX1	ARMCX1	1	-0.156755	2.96648	0.340405	3.68963
ARMETL1	ARMETL1	1	-0.024327	2.12837	0.162222	2.48736
ARNTL2	ARNTL2	1	1.32002	1.36535	1.75459	1.67198
ASPHD2	ASPHD2	1	1.28774	1.50816	1.58312	2.46992
ASRGL1	ASRGL1	1	0.722355	1.30884	0.181935	1.7148
B3GALT3	B3GALT3	1	0.8578	2.09689	0.98251	2.99238
BACH2	BACH2	1	1.00261	1.0956	0.966265	1.61851
BBC3	BBC3	1	-0.478478	2.46373	0.579677	4.4593
BCAP29	BCAP29	1	1.00857	0.967185	2.27865	1.68194
BDKRB1	BDKRB1	1	2.71078	1.41304	2.08088	1.43124
BIRC4	BIRC4	1	0.440242	1.67643	1.64078	3.0797
BTBD14A	BTBD14A	1	1.68171	3.9362	-0.33897	2.33072
BTC	BTC	1	1.13978	1.66831	1.86613	2.21285
BTN3A3	BTN3A3	1	0.995175	1.47349	1.16476	0.47803
BVES	BVES	1	1.15891	1.95011	1.29975	1.03793
C12orf39	C12orf39	1	0.270325	2.06784	-0.754465	3.67565
C12orf59	C12orf59	1	1.65273	1.06553	2.57085	0.639702
C14orf168	C14orf168	1	1.20314	3.4108	0.522175	0.15869
C17orf60	C17orf60	1	0.680205	2.05458	1.74466	2.3462
C18orf8	C18orf8	1	0.669285	1.62953	0.757845	1.67708
C1orf90	C1orf90	1	1.31275	0.99058	2.7395	0.44829
C20orf118	C20orf118	1	1.5811	1.57884	1.11779	0.661125
C21orf82	C21orf82	1	0.05945	1.87301	-0.30945	2.37723
C3orf32	C3orf32	1	0.262003	2.90152	0.474278	3.55837
C3orf52	C3orf52	1	1.4395	0.903105	3.20343	0.463985
C6orf128	C6orf128	1	1.77501	1.51162	1.73694	2.37185
C6orf150	C6orf150	1	0.766355	1.9961	0.874195	2.77453
C6orf203	C6orf203	1	0.019117	2.11016	-0.880495	1.87627
C6orf66	C6orf66	1	0.80835	1.17359	0.05721	1.06598
C8orf1	C8orf1	1	0.4545	2.40595	0.274625	3.30359
CAB39L	CAB39L	1	0.231433	2.36945	-1.08614	1.66681
CALCOCO2	CALCOCO2	1	0.73652	1.2042	1.28086	0.412423
CAMLG	CAMLG	1	0.123855	1.81001	-0.45258	2.24265
CASP4	CASP4	1	1.92547	1.42794	2.55169	1.7453
CASP5	CASP5	1	1.95548	1.78256	1.63491	1.30451
CASP7	CASP7	1	1.56137	1.4466	1.04384	0.988885
CBR3	CBR3	1	1.76602	1.62119	1.62893	0.911242
CCL2	CCL2	1	2.94871	2.49562	1.30124	1.33886
CCL7	CCL7	1	3.01159	3.18708	0.79963	1.23236
CD274	CD274	1	3.41859	3.38841	2.50153	1.1282
CD53	CD53	1	1.66673	0.9002	2.33432	1.7799
CD7	CD7	1	3.21345	2.80856	0.66493	-0.357947
CEACAM1	CEACAM1	1	1.31305	1.21975	1.55361	1.22441
CEACAM3	CEACAM3	1	0.947933	1.36999	0.418992	0.658683
CFB	CFB	1	0.76549	1.24264	1.95419	0.662807
CFLAR	CFLAR	1	1.20134	1.0426	1.88169	2.3045
CHRD	CHRD	1	2.55449	1.9636	0.910772	0.964647
CLDN1	CLDN1	1	2.94083	2.79792	2.54062	1.32006
CLEC2B	CLEC2B	1	1.02568	3.92296	0.605178	3.43671
CLMN	CLMN	1	0.296445	2.01161	0.94385	1.9109
COVA1	COVA1	1	0.393335	1.75473	1.78952	3.31682
CPA4	CPA4	1	0.794315	1.56424	0.586505	1.09356
CSF1	CSF1	1	2.14106	1.33562	2.71035	0.922104
CXCL16	CXCL16	1	2.53153	1.59417	2.00036	0.876655
CXCL2	CXCL2	1	2.09091	2.32392	1.27087	2.07529
CYLD	CYLD	1	0.878117	1.1267	2.78692	1.985
CYP24A1	CYP24A1	1	1.78516	0.833983	2.30275	0.823185
DACT1	DACT1	1	1.1971	1.26229	1.00341	1.00998
DCAMKL1	DCAMKL1	1	0.33312	3.45498	0.17409	1.3349
DDIT3	DDIT3	1	1.58116	3.29646	-0.375525	2.64349
DKFZp686I1569	DKFZp686I1569	1	-0.69715	2.80784	0.253005	3.7479
DKFZp761P0423	DKFZp761P0423	1	1.46826	3.29855	0.40448	3.72494
DMGDH	DMGDH	1	0.019905	2.20066	-0.35801	2.80748
DNAJC3	DNAJC3	1	0.58106	2.33767	0.96802	3.58896
DRD5	DRD5	1	1.22628	4.6338	-0.856985	4.00692
DSPP	DSPP	1	0.63323	1.61915	-0.371335	1.76093
DUSP5	DUSP5	1	1.95471	2.00732	1.15924	0.73899
DUSP6	DUSP6	1	1.99528	2.55363	1.66802	2.91669
DYX1C1	DYX1C1	1	0.60728	2.52336	-0.511418	2.39068
EAF2	EAF2	1	0.811455	2.03168	1.63296	3.46177
EDN1	EDN1	1	2.23523	2.51	2.23047	2.08832
EDNRA	EDNRA	1	2.91397	3.05033	2.57415	0.895345
EML1	EML1	1	0.539958	1.6302	2.42766	2.20864
EREG	EREG	1	0.910665	1.33221	1.01043	1.47537
ERRFI1	ERRFI1	1	1.27492	2.0115	1.28469	3.15883
ETV5	ETV5	1	1.70677	2.03231	2.44627	0.908725
FAM3B	FAM3B	1	0.513472	2.45712	-0.937922	1.55296
FAM46C	FAM46C	1	2.17706	0.968135	1.22019	0.905295
FANCM	FANCM	1	0.404945	1.64407	1.75363	3.20032
FCER1G	FCER1G	1	0.501533	1.5358	1.22598	1.34217
FGF13	FGF13	1	0.081735	2.12016	-0.369785	1.94577
FLJ11259	FLJ11259	1	1.66833	1.70274	2.60226	1.72194
FLJ11286	FLJ11286	1	0.971343	1.63066	0.738622	1.02683
FLJ20516	FLJ20516	1	0.522535	1.40857	1.14622	2.74024
FLJ22639	FLJ22639	1	-0.19833	2.20262	-0.23257	2.00979
FLJ25006	FLJ25006	1	0.03285	3.10418	0.56401	4.58974
FLJ25801	FLJ25801	1	0.101195	2.12275	-0.975782	2.48701
FLJ32255	FLJ32255	1	2.35186	2.25551	2.66514	1.89743
FLJ35630	FLJ35630	1	0.371552	2.72009	0.507383	3.72317
FLJ36004	FLJ36004	1	2.18032	1.64626	1.04996	1.41976
FLJ38969	FLJ38969	1	0.143845	2.90526	-0.577265	2.81519
FLJ40176	FLJ40176	1	0.23697	2.75265	0.1449	0.825545
FLJ40722	FLJ40722	1	1.89033	0.688015	0.7232	0.376865
FLJ45645	FLJ45645	1	-0.026775	2.77719	-0.625315	4.25314
FLRT2	FLRT2	1	0.21055	1.81173	0.848315	3.3723
FLT3LG	FLT3LG	1	1.85934	1.421	2.04627	1.21738
FOSB	FOSB	1	0.196725	2.70456	-0.55041	1.02123
FOXD4	FOXD4	1	-0.196005	2.70449	0.567035	1.50124
FRZB	FRZB	1	0.733155	1.60246	0.605977	0.884755
FSIP1	FSIP1	1	0.246435	2.00346	0.77745	2.6857
FYN	FYN	1	0.77956	1.88662	-0.851243	1.36795
G0S2	G0S2	1	1.20226	4.05647	-0.476345	4.11402
GBP4	GBP4	1	1.77462	1.0156	3.77782	0.690948
GBP7	GBP7	1	1.12223	0.94468	0.729165	2.05165
GDF15	GDF15	1	0.907575	4.03289	-0.515613	2.07828
GLDN	GLDN	1	0.43424	2.07763	-0.229692	2.06988
GLIPR1	GLIPR1	1	1.03609	1.23176	2.65932	1.13407
GLRX	GLRX	1	1.28727	2.36509	2.44396	1.40768
GLS	GLS	1	1.02524	1.35076	2.64243	1.8735
GNG2	GNG2	1	0.134875	3.21401	-0.051042	3.73518
GPR109B	GPR109B	1	0.66887	2.44166	-0.792575	1.62289
GPR19	GPR19	1	-0.125965	3.37168	-0.112985	2.5426
GPR39	GPR39	1	1.31109	1.45608	2.2012	2.1077
GPR64	GPR64	1	1.65271	2.48909	1.96317	1.3084
HAPLN3	HAPLN3	1	4.36744	3.24917	1.29018	-0.593897
HBEGF	HBEGF	1	1.95314	2.84279	0.971665	0.214845
HCFC2	HCFC2	1	0.52362	1.88743	0.858345	3.50334
HCG4P6	HCG4P6	1	0.21187	2.97618	1.05116	0.506
HECA	HECA	1	0.38775	2.51234	-0.278965	3.3277
HECW2	HECW2	1	0.433275	3.09572	0.318935	4.2881
HEL308	HEL308	1	-0.014233	1.96312	-0.058925	2.40427
HHAT	HHAT	1	2.5042	1.11997	1.39153	-0.08906
HIVEP2	HIVEP2	1	0.40483	2.03735	0.511845	3.042
HKDC1	HKDC1	1	1.90952	1.62085	2.00066	1.0301
HLA-F	HLA-F	1	0.565112	1.3941	1.23395	1.86698
HMFN0839	HMFN0839	1	1.47741	1.05924	2.67925	0.20221
HMGA2	HMGA2	1	0.963305	1.51231	1.83135	0.702473
HNF4G	HNF4G	1	1.09404	1.05021	2.46516	1.89434
HRH1	HRH1	1	1.68799	0.83152	2.41757	2.43958
HTR1D	HTR1D	1	0.496745	1.89674	0.433695	0.452455
IER3	IER3	1	1.49371	0.723882	0.940507	0.903695
IFI35	IFI35	1	2.42006	1.43938	1.98052	0.35131
IFI44	IFI44	1	1.96668	2.83925	2.02947	2.35901
IFITM1	IFITM1	1	1.60696	1.11945	2.13044	1.33223
IGFBPL1	IGFBPL1	1	0.397605	2.62975	-1.43434	2.31982
IL12A	IL12A	1	0.677018	1.53193	1.30157	2.28575
IL15RA	IL15RA	1	2.3234	0.98601	2.71391	2.00116
IL18R1	IL18R1	1	1.30357	1.39926	1.32237	1.26655
IL2RG	IL2RG	1	1.83055	1.31064	0.121302	1.15763
IL7R	IL7R	1	2.17238	1.32638	2.0109	-0.666955
INDOL1	INDOL1	1	1.37098	2.20651	-0.07116	2.36969
INSL4	INSL4	1	1.65214	2.72268	-1.19571	1.8028
IRAK2	IRAK2	1	1.66233	1.59804	2.2843	2.32165
IRS1	IRS1	1	0.828732	2.02738	0.859355	2.25706
JAG1	JAG1	1	1.77403	2.69686	1.01626	0.597795
JUN	JUN	1	0.869323	2.03708	0.961227	1.68172
KCNE2	KCNE2	1	-0.28248	2.63354	-0.113528	2.89493
KCNJ15	KCNJ15	1	1.01381	3.00226	0.090482	2.05263
KCNJ6	KCNJ6	1	0.932805	2.63451	0.72528	2.57618
KCNK2	KCNK2	1	1.52258	1.10624	2.96591	1.5358
KIAA0513	KIAA0513	1	0.210425	2.00839	1.06832	3.13057
KIAA0802	KIAA0802	1	0.974217	1.10802	1.74125	2.34973
KIAA1143	KIAA1143	1	0.57443	1.8795	-0.072267	1.36464
KIAA1217	KIAA1217	1	1.67139	1.94465	1.70165	2.14169
KIAA1559	KIAA1559	1	0.266805	2.04718	0.49664	3.62421
KIN	KIN	1	0.551963	1.97344	2.09676	2.23008
KIR2DL1	KIR2DL1	1	1.28012	2.30104	0.233178	0.447295
KIR2DL2	KIR2DL2	1	1.11831	4.39055	0.705965	3.78702
KIR2DL3	KIR2DL3	1	1.34426	3.71672	0.560858	2.51471
KIR2DL4	KIR2DL4	1	1.32843	2.18059	0.447074	1.02671
KIR2DL5A	KIR2DL5A	1	1.58713	4.37421	0.15512	2.42208
KIR2DS1	KIR2DS1	1	1.75205	1.77872	1.04333	0.344913
KIR2DS2	KIR2DS2	1	1.08171	2.78617	0.338972	1.41246
KIR2DS4	KIR2DS4	1	1.08936	2.23918	0.240212	0.690018
KIR2DS5	KIR2DS5	1	1.07693	4.14129	0.97443	3.79936
KIR3DL1	KIR3DL1	1	1.23645	2.40951	0.441341	0.737664
KIR3DL2	KIR3DL2	1	1.23454	3.01197	-0.184027	1.18677
KIR3DL3	KIR3DL3	1	0.74872	2.97078	0.6367	2.86545
KIR3DP1	KIR3DP1	1	1.71392	3.17606	1.41317	0.573555
KRT6A	KRT6A	1	1.67512	2.96251	-0.244617	0.495333
KRT6C	KRT6C	1	1.88655	3.43926	-0.205785	0.693305
LCHN	LCHN	1	0.487425	1.71411	0.242155	2.62035
LETM2	LETM2	1	2.74381	4.52004	0.762598	2.75361
LGALS8	LGALS8	1	0.723681	1.26469	0.255079	1.13459
LGP2	LGP2	1	1.47715	1.79198	1.03313	0.573185
LGR6	LGR6	1	0.49848	1.88763	0.735325	3.12353
LHX2	LHX2	1	0.851932	1.41927	1.48075	2.62726
LHX9	LHX9	1	0.98144	1.50154	1.27503	1.99909
LIN7B	LIN7B	1	0.89089	3.59562	-0.37171	1.59397
LOC128102	LOC128102	1	0.386805	2.47045	-0.091385	1.13464
LOC129531	LOC129531	1	1.38285	2.23623	-0.04046	1.29131
LOC130940	LOC130940	1	0.315259	1.68615	0.324886	2.08918
LOC147158	LOC147158	1	0.88579	2.51715	0.12267	0.92382
LOC157740	LOC157740	1	0.094695	2.08387	0.056985	2.96455
LOC197135	LOC197135	1	0.641086	1.4173	1.63812	3.2134
LOC257358	LOC257358	1	0.48695	1.50429	-0.372935	1.47487
LOC283537	LOC283537	1	-0.112058	3.78777	-0.100395	0.774632
LOC283551	LOC283551	1	0.32588	5.09865	0.139745	1.6143
LOC284861	LOC284861	1	-0.02922	1.9569	-1.10835	2.05632
LOC342934	LOC342934	1	0.918165	2.35348	-0.077345	1.91122
LOC387647	LOC387647	1	0.046885	2.37576	0.40142	2.3191
LOC391609	LOC391609	1	0.20468	2.47804	0.27065	0.5792
LOC401898	LOC401898	1	0.053875	2.01577	0.74191	2.24907
LOC440356	LOC440356	1	0.024395	2.11755	-0.151345	2.5179
LOC440685	LOC440685	1	1.74036	0.781825	1.71747	1.99357
LOC440731	LOC440731	1	0.241798	1.9906	-0.370532	1.67124
LOC441108	LOC441108	1	1.21627	2.75294	0.11633	1.12611
LOC442423	LOC442423	1	0.487645	1.47184	1.9465	1.50547
LOC550643	LOC550643	1	-0.14895	2.21312	0.338405	3.27535
LOC554223	LOC554223	1	0.798777	2.55885	1.89604	1.77955
LOC642483	LOC642483	1	0.292715	2.57181	-0.35433	1.92591
LOC642646	LOC642646	1	0.456735	1.69847	0.128285	1.9591
LOC642690	LOC642690	1	1.83874	2.38608	-0.123275	2.64618
LOC642819	LOC642819	1	0.39704	2.61597	-0.140055	3.6036
LOC642981	LOC642981	1	0.393405	1.70368	1.02921	2.13844
LOC643052	LOC643052	1	-0.315045	2.44793	2.2054	1.37907
LOC643389	LOC643389	1	-0.628055	2.69401	0.86488	4.17497
LOC643676	LOC643676	1	1.20582	2.29508	1.2483	1.26428
LOC643837	LOC643837	1	1.05512	2.46979	1.21351	3.15631
LOC643985	LOC643985	1	-0.54617	2.65299	1.14616	3.9451
LOC644058	LOC644058	1	0.01954	2.74444	-0.27819	1.87214
LOC644391	LOC644391	1	-0.4817	2.6007	0.034805	2.91418
LOC644634	LOC644634	1	1.15046	1.70303	1.32748	1.14556
LOC644808	LOC644808	1	0.528005	1.59061	0.05514	1.02335
LOC644863	LOC644863	1	0.450815	1.51649	0.844185	1.52512
LOC645342	LOC645342	1	-0.309885	2.35259	0.16983	0.509905
LOC645967	LOC645967	1	-0.283225	2.83075	-1.09079	2.72533
LOC646626	LOC646626	1	0.871115	2.55823	-0.23221	1.34305
LOC646778	LOC646778	1	-0.222895	3.13628	0.66024	2.0126
LOC647315	LOC647315	1	1.66231	1.62133	-0.606335	1.45312
LOC653193	LOC653193	1	2.82746	2.34607	0.973765	1.2128
LOC653282	LOC653282	1	0.380325	2.92827	-0.579785	3.23269
LOC653654	LOC653654	1	0.58762	1.90067	-0.12497	2.05562
LOC653691	LOC653691	1	1.25426	2.11361	0.754515	0.58707
LOC653788	LOC653788	1	1.71864	1.12528	1.45319	1.05256
LOC654346	LOC654346	1	0.768774	1.72802	0.292843	0.695277
LRRC6	LRRC6	1	-0.04529	3.33113	-0.011955	1.97803
LRRC8C	LRRC8C	1	1.27328	1.01803	2.57991	2.19605
LSM5	LSM5	1	0.229687	1.76654	-0.20633	2.1396
LSM6	LSM6	1	0.868385	1.79256	-0.04678	1.09755
LTBP2	LTBP2	1	1.52354	2.75022	1.89919	1.46616
LYPD1	LYPD1	1	1.10762	1.80986	0.77268	0.48647
LYPD5	LYPD5	1	2.29105	3.16039	1.58593	3.07176
MAP2	MAP2	1	1.18398	0.977605	2.13386	1.44267
MFAP3L	MFAP3L	1	0.931442	2.08924	2.20904	1.54315
MGC16075	MGC16075	1	0.13996	2.47932	0.74851	1.96714
MGC20470	MGC20470	1	0.268917	1.79559	-0.079765	0.945153
MGC87042	MGC87042	1	0.88749	3.44278	0.18615	2.20798
MMPL1	MMPL1	1	2.29505	1.31333	1.71913	0.67035
MPHOSPH6	MPHOSPH6	1	0.212358	1.72201	1.57349	3.4948
MRPS36	MRPS36	1	0.44138	2.43313	0.126332	1.96152
MTMR3	MTMR3	1	0.42355	1.8458	-0.479115	1.68041
MTMR6	MTMR6	1	0.61668	2.48779	-0.62998	2.72886
MXRA5	MXRA5	1	2.09754	0.29006	1.11108	1.18572
MYH3	MYH3	1	0.730705	2.28039	1.60318	1.2147
NDUFA12	NDUFA12	1	0.519885	1.66682	-0.108588	1.30884
NDUFB6	NDUFB6	1	0.511454	1.80264	-0.248817	1.04616
NEDD9	NEDD9	1	2.1979	1.19268	2.48771	1.94011
NGFB	NGFB	1	3.56327	2.9689	1.54133	2.10687
NMI	NMI	1	1.06159	1.1632	1.70813	2.15396
NR4A2	NR4A2	1	1.2835	2.38672	1.33442	2.87834
NRG1	NRG1	1	1.86517	1.72433	2.03883	2.33969
NUAK2	NUAK2	1	1.27232	1.87768	-0.18869	1.31518
NUCB2	NUCB2	1	0.594255	2.05204	0.77259	2.74551
OR2A1	OR2A1	1	1.63834	1.80532	1.47664	2.16103
OR2A4	OR2A4	1	1.07319	1.41168	0.28523	0.73338
OR2A42	OR2A42	1	1.47378	1.86329	1.32479	2.15839
OR2A9P	OR2A9P	1	1.53441	1.64208	0.43685	0.7991
OSR1	OSR1	1	0.657565	1.37746	0.98404	2.33616
PAGE2	PAGE2	1	1.34877	1.8787	-1.18447	1.66403
PAGE2B	PAGE2B	1	1.2998	1.7829	-0.40515	2.50519
PCCA	PCCA	1	0.16171	1.99389	1.64179	3.4643
PCDH7	PCDH7	1	1.30566	2.25739	1.0382	1.64977
PCDHAC1	PCDHAC1	1	0.035385	1.9278	-0.681015	2.62065
PDZK1	PDZK1	1	0.495815	1.77558	0.07985	1.13965
PGBD5	PGBD5	1	1.99651	3.07313	0.363735	2.11989
PITPNC1	PITPNC1	1	1.87398	2.3251	1.61361	1.10297
PLAUR	PLAUR	1	1.18217	0.919947	1.28251	0.301107
PLEK2	PLEK2	1	1.01085	1.46348	0.08192	0.885485
PLEKHA7	PLEKHA7	1	1.3522	2.52845	2.53095	-0.015895
PRDM10	PRDM10	1	0.442085	1.89202	0.22644	1.20887
PRKAR2B	PRKAR2B	1	0.02431	2.33126	0.89674	2.43755
PRNP	PRNP	1	0.496745	1.9078	1.10095	3.26318
PRP2	PRP2	1	1.32591	2.8901	1.01755	1.72826
PSD2	PSD2	1	-0.135445	2.55476	-0.15023	0.98999
PSG8	PSG8	1	1.05749	1.87323	0.726545	0.110577
PSME1	PSME1	1	0.947845	1.00232	1.61809	0.990973
PTENP1	PTENP1	1	0.292515	2.21526	-0.64224	2.51095
PTPRO	PTPRO	1	0.893178	1.40957	0.89878	1.07983
PTS	PTS	1	0.847965	1.52176	0.478115	1.25589
PTX3	PTX3	1	2.61396	3.23021	0.55568	1.15268
PVRL4	PVRL4	1	-0.22745	3.19243	1.0807	2.48695
QDPR	QDPR	1	0.491743	1.63688	-0.357835	1.12709
RAPGEF3	RAPGEF3	1	0.488115	1.73556	-0.554326	1.66889
RBM11	RBM11	1	1.04947	3.53804	1.27477	3.23397
REPS2	REPS2	1	0.57117	2.24302	-0.51984	1.75551
REXO1L1	REXO1L1	1	-0.11169	2.82075	-0.431965	2.27969
REXO1L2P	REXO1L2P	1	0.49931	3.38247	-0.68129	2.36797
REXO1L3P	REXO1L3P	1	0.026015	2.8605	-0.77586	1.93334
REXO1L5P	REXO1L5P	1	0.25448	2.95358	-0.67967	2.20789
REXO1L6P	REXO1L6P	1	0.088275	1.91376	-0.43666	1.89322
REXO1L7P	REXO1L7P	1	0.60004	3.23529	-1.04712	1.57113
RFP2OS	RFP2OS	1	0.24939	1.67796	0.24229	2.13169
RGS17	RGS17	1	1.82279	2.67	1.46856	1.31356
RHEBL1	RHEBL1	1	1.44318	1.07987	2.04442	2.08218
RIPK2	RIPK2	1	1.46641	1.27365	1.58564	1.78724
RNF149	RNF149	1	0.86073	1.10509	0.982455	1.62479
RNF36	RNF36	1	1.66004	2.8154	1.43334	1.98858
RP1-93H18.5	RP1-93H18.5	1	0.530275	2.03578	1.35548	3.33864
RP11-298P3.3	RP11-298P3.3	1	0.453933	1.81215	0.93059	1.24034
RP3-473B4.1	RP3-473B4.1	1	0.450923	1.7311	0.146927	1.89053
RPS27L	RPS27L	1	0.522245	1.83279	0.096872	0.769213
RRAGD	RRAGD	1	0.47057	3.17561	-0.276625	2.74324
RSAD2	RSAD2	1	0.21294	2.71374	0.931435	2.84082
S100P	S100P	1	0.602062	3.77718	0.477247	3.86079
SAP30L	SAP30L	1	0.315465	1.89207	-0.829405	2.0484
SAT	SAT	1	1.57289	2.24373	0.990027	1.61716
SCG2	SCG2	1	1.88849	1.015	0.682447	1.66708
SCG5	SCG5	1	0.085465	3.1313	-0.388385	3.15302
SECTM1	SECTM1	1	3.25865	2.4636	2.85076	-0.06061
SENP5	SENP5	1	0.76956	2.46683	-0.202955	2.98034
SERPINE1	SERPINE1	1	1.00343	1.56247	2.28552	0.148875
SHC3	SHC3	1	1.50134	2.075	0.891195	1.24226
SHC4	SHC4	1	0.721313	1.455	0.919997	2.02293
SLC15A2	SLC15A2	1	0.193245	2.62788	1.15494	1.75575
SLC16A4	SLC16A4	1	-0.18554	2.32149	0.919555	0.781983
SLC16A6	SLC16A6	1	1.28675	1.72307	1.81358	1.81057
SLC22A2	SLC22A2	1	0.47221	2.01312	0.352422	0.552295
SLC6A3	SLC6A3	1	0.23955	2.04094	0.392735	3.4279
SOD2	SOD2	1	1.06721	2.21709	0.951993	2.04599
SP8	SP8	1	0.04432	2.81729	0.22146	3.32782
SPOCK2	SPOCK2	1	0.161192	2.78143	-0.162257	2.1485
SQRDL	SQRDL	1	1.28812	0.787865	3.38213	1.4104
SRG	SRG	1	1.6745	0.908115	0.692835	0.760865
ST8SIA5	ST8SIA5	1	0.493602	1.76993	1.04896	1.53723
STIM2	STIM2	1	0.60605	1.92891	-0.774525	1.65751
STMN3	STMN3	1	1.59488	3.11994	-0.150062	2.09646
STOX1	STOX1	1	0.65343	1.28173	-0.082585	1.49394
STS-1	STS-1	1	1.92946	1.43125	2.45112	1.61013
STX11	STX11	1	2.6401	2.12848	2.5134	2.2243
SUGT1	SUGT1	1	0.37646	1.68042	-0.116672	0.902792
TAF13	TAF13	1	0.832635	3.24824	0.043455	3.66818
TAOK3	TAOK3	1	0.492717	1.91983	0.55535	2.88742
TAP1	TAP1	1	2.5381	0.71456	2.23718	0.009675
TAPBPL	TAPBPL	1	1.76096	0.38452	3.12041	1.17287
TBX15	TBX15	1	2.34263	0.97792	3.07247	0.592575
TBX2	TBX2	1	0.791652	2.43213	-0.742302	1.18219
THPO	THPO	1	0.816433	1.40487	0.165309	0.805079
THRB	THRB	1	0.377808	1.61351	0.316443	2.07507
TM4SF19	TM4SF19	1	0.52299	2.1602	1.13625	3.59456
TMED6	TMED6	1	0.47381	2.81325	1.35499	1.79832
TMEM92	TMEM92	1	0.786325	1.95793	0.50899	0.534735
TMPRSS3	TMPRSS3	1	2.40641	0.845996	1.83548	0.23704
TNFAIP8L3	TNFAIP8L3	1	0.756265	1.75588	1.39505	-0.25024
TNFRSF14	TNFRSF14	1	2.27821	1.54755	2.07889	0.412507
TNFRSF1B	TNFRSF1B	1	1.75204	2.45301	0.370988	0.434445
TNFRSF21	TNFRSF21	1	1.43271	0.964055	1.96061	2.09318
TNFSF10	TNFSF10	1	0.86175	1.8016	2.49997	2.31074
TNFSF13B	TNFSF13B	1	0.496387	1.65779	0.03839	1.35543
TOR1B	TOR1B	1	0.888035	1.92246	0.97942	0.58989
TPK1	TPK1	1	0.378315	2.43962	2.36542	2.48622
TPRKB	TPRKB	1	0.375103	1.67302	0.516685	2.62588
TRHDE	TRHDE	1	-0.01896	3.0059	0.02955	1.46087
TRIM21	TRIM21	1	2.01124	1.94992	1.08766	0.650223
TRIM38	TRIM38	1	1.40952	1.76446	2.27387	2.66148
TRIM45	TRIM45	1	0.489715	1.77238	1.17963	3.37064
TRIM8	TRIM8	1	0.0491	2.25875	1.13437	3.14891
UBE1L	UBE1L	1	3.47092	1.49255	2.84744	-0.560225
USP18	USP18	1	1.49544	0.445795	3.62194	1.03324
VEGFC	VEGFC	1	2.66231	3.80311	2.10631	1.87656
WARS	WARS	1	1.54207	1.28014	2.12244	1.04192
WBP4	WBP4	1	0.41527	2.15749	-0.11495	1.68902
WDR7	WDR7	1	0.5172	2.09104	-0.266735	2.00961
ZBTB34	ZBTB34	1	0.949895	1.71506	2.37529	2.24989
ZBTB43	ZBTB43	1	0.59511	1.85216	-0.45589	1.82645
ZFP36	ZFP36	1	1.7574	0.936345	1.6354	0.369855
ZFP37	ZFP37	1	0.201305	2.30766	-0.851525	2.26248
ZFYVE28	ZFYVE28	1	1.08681	2.22831	1.71505	2.72978
ZNF165	ZNF165	1	0.246827	2.1163	1.35517	1.44592
ZNF177	ZNF177	1	0.033057	2.1076	0.917215	3.64881
ZNF20	ZNF20	1	0.856283	3.32256	-1.36969	1.98026
ZNF267	ZNF267	1	0.966385	1.18172	0.941755	0.336365
ZNF336	ZNF336	1	0.086025	2.29928	-1.26059	2.09465
ZNF397	ZNF397	1	0.492883	2.35283	0.627032	3.74718
ZNF480	ZNF480	1	0.515605	1.78456	1.48884	3.23049
ZNF490	ZNF490	1	0.157115	2.45605	0.881055	0.36732
ZNF521	ZNF521	1	0.46923	2.13855	-0.341655	2.16589
ZNF547	ZNF547	1	0.030125	2.3916	0.294245	3.35019
ZNF575	ZNF575	1	1.10787	2.12725	-0.484413	2.58687
ZNF585A	ZNF585A	1	0.1225	2.18343	-0.408205	3.36126
ZNF596	ZNF596	1	0.327245	1.88466	0.714775	1.83909
ZNF613	ZNF613	1	0.442022	2.20943	-0.379465	1.78182
ZNF708	ZNF708	1	-0.0698	2.91084	0.791385	3.97836
Cluster 3
gene_name	NAME	GWEIGHT	AVG6hACT	AVG24hACT	AVG6hREACT	AVG24hREACT
ACSL5	ACSL5	1	3.98462	5.25578	6.79727	6.84668
AIM2	AIM2	1	0.85855	4.75443	4.51872	5.81216
BATF2	BATF2	1	6.92326	6.60579	7.08053	6.37418
BIRC4BP	BIRC4BP	1	3.75043	4.29192	4.78214	3.66336
CASP1	CASP1	1	2.74351	3.21748	5.04526	5.04032
CD74	CD74	1	5.05531	6.44294	3.99867	3.43767
CLIC2	CLIC2	1	1.84865	3.22731	5.99376	6.47542
COP1	COP1	1	3.23258	4.73099	5.62265	6.73688
CTSS	CTSS	1	3.473	4.73183	4.92677	5.67354
CXCL10	CXCL10	1	5.92436	4.69846	6.45833	1.7729
CXCL11	CXCL11	1	3.76594	4.37226	4.96306	3.37725
ETV7	ETV7	1	4.89647	4.29253	3.99877	3.258
FLJ20035	FLJ20035	1	1.94758	2.59991	8.46418	8.15223
GBP1	GBP1	1	2.91961	2.44343	6.09361	5.28911
GBP3	GBP3	1	4.12217	4.25807	7.78484	7.726
HLA-DMB	HLA-DMB	1	3.67647	5.71332	7.29435	6.79107
HLA-DPA1	HLA-DPA1	1	2.70253	7.57983	7.75955	8.54113
HLA-DPB1	HLA-DPB1	1	3.72239	7.63277	8.04576	8.5398
HLA-DRA	HLA-DRA	1	4.25592	5.60247	7.93179	6.16355
HLA-DRB1	HLA-DRB1	1	3.62405	5.6425	6.78353	5.33242
HLA-DRB3	HLA-DRB3	1	3.76477	6.45306	6.84245	4.89148
HLA-DRB5	HLA-DRB5	1	1.41572	3.94192	5.84239	4.18666
IFI27	IFI27	1	3.68445	5.37687	5.5485	6.26553
IFIH1	IFIH1	1	3.13176	3.76554	5.68407	4.51931
IFIT1	IFIT1	1	0.85521	2.55643	6.01577	6.58892
IFIT3	IFIT3	1	4.03184	1.42361	7.15691	2.52371
IL7	IL7	1	3.40534	3.57306	5.5122	5.9031
INCA	INCA	1	3.0673	4.94804	4.23571	5.8545
INDO	INDO	1	8.74517	9.5551	8.48127	8.32601
LOC400696	LOC400696	1	5.43353	6.19036	4.95277	4.62261
MUC13	MUC13	1	2.18598	3.40476	4.95979	5.4582
MX1	MX1	1	3.02449	2.40261	6.7288	3.91673
OAS2	OAS2	1	2.21748	3.8173	5.30842	4.10425
PARP9	PARP9	1	2.93721	2.81275	9.39103	8.78251
PDZD2	PDZD2	1	2.05365	2.45072	6.9867	7.96351
PSMB9	PSMB9	1	3.62491	3.97981	4.09214	3.9253
RTP4	RTP4	1	4.46079	5.25335	5.72118	3.65767
SAMD9L	SAMD9L	1	5.1356	6.01678	8.12537	8.37002
SAMHD1	SAMHD1	1	1.55038	2.20037	6.6114	6.46528
TRIM22	TRIM22	1	3.27366	2.70704	5.9613	3.39072
UBD	UBD	1	7.56765	5.82559	7.39157	4.26292
UBE2L6	UBE2L6	1	4.91493	3.63501	6.66083	5.09885
